# Supplementary material for: Risk factors for community-acquired bacterial infection among young infants in South Asia: a longitudinal cohort study with nested case–control analysis
Source: PubMed Central journal article supplement (PMC9628539; doi:10.1136/bmjgh-2022-009706), 2022-11-01
Supplement: bmjgh-2022-009706supp001.pdf [file bmjgh-2022-009706supp001.pdf]

Web Tables for: Risk factors for community-acquired bacterial infection among South Asian young infants: a primary analysis of the ANISA longitudinal cohort study with nested case–control analysis

**Web Table 1 - Neonatal health status risk factors – univariate analysis**

|                                          | <b>Bacterial Infection</b> |                     |                      |
|------------------------------------------|----------------------------|---------------------|----------------------|
|                                          | <b>Relative Risk</b>       | <b>p-value</b>      | <b>95% Cred. Int</b> |
| Moderate or late preterm (32- <37 weeks) | 1.34                       | 0.013*              | 1.06,1.68            |
| Very and extremely preterm (<32 weeks)   | 1.72                       | 0.026*              | 1.07,2.77            |
| Multiple births (pluripara)              | 1.82                       | 0.018*              | 1.12,2.98            |
| Low birth weight <2500g                  | 1.66                       | 0.000***            | 1.37,2.00            |
| Very low birth weight <1500g             | 5.83                       | 0.000***            | 3.86,8.82            |
| Male sex                                 | 1.26                       | 0.010*              | 1.06,1.50            |
| Congenital anomaly detected at birth     | 2.41                       | 0.076               | 0.91,6.39            |
| Breathing problems reported at birth     | 2.18                       | 0.000***            | 1.75,2.70            |
| Jaundice (mild and moderate)*            | 0.87                       | 0.490               | 0.59,1.29            |
| Severe jaundice*                         | 2.17                       | 0.116               | 0.83,5.69            |
| Skin pustules detected                   | 0.60                       | 0.537               | 0.12,3.05            |
| <i>Sample size variation</i>             |                            | n = 57,353 - 58,907 |                      |

\*Physician reported

**Web Table 2 - Maternal risk factors – univariate analysis**

|                                                    | <b>Bacterial Infection</b> |                |                      |
|----------------------------------------------------|----------------------------|----------------|----------------------|
|                                                    | <b>Relative Risk</b>       | <b>p-value</b> | <b>95% Cred. Int</b> |
| Birth spacing 18-59 months from last birth         | 0.79                       | 0.007**        | 0.67,0.94            |
| Birth spacing < 18 months from last birth          | 0.71                       | 0.079          | 0.48,1.04            |
| <b>Prior births</b>                                |                            |                |                      |
| 1 Prior birth                                      | 0.74                       | 0.010          | 0.59,0.93            |
| 2 Prior births                                     | 0.62                       | 0.002**        | 0.46,0.83            |
| 3+ Prior births                                    | 0.84                       | 0.078          | 0.69,1.02            |
| Maternal fever reported - prior 7 days             | 1.19                       | 0.293          | 0.86,1.63            |
| Fever during pregnancy                             | 1.20                       | 0.167          | 0.93,1.56            |
| Foul discharge reported - pregnancy                | 1.27                       | 0.322          | 0.79,2.06            |
| Foul discharge reported - birth                    | 1.21                       | 0.129          | 0.95,1.53            |
| Bleeding reported during pregnancy                 | 1.35                       | 0.400          | 0.67,2.72            |
| Convulsions reported during pregnancy              | 1.43                       | 0.516          | 0.49,4.18            |
| Swelling reported during pregnancy                 | 0.93                       | 0.576          | 0.73,1.19            |
| Moderate nutritional risk (MUAC) (<23cm)           | 1.02                       | 0.872          | 0.82,1.27            |
| High nutritional risk (MUAC) (<20.7cm)             | 0.98                       | 0.923          | 0.63,1.52            |
| Unknown nutritional status                         | 1.16                       | 0.282          | 0.88,1.52            |
| Physical work reported during pregnancy            | 1.18                       | 0.074          | 0.98,1.42            |
| Respiratory illness reported                       | 1.11                       | 0.404          | 0.87,1.41            |
| <b>Antenatal care (ANC) visits (none baseline)</b> |                            |                |                      |
| 1 ANC visit                                        | 1.04                       | 0.814          | 0.75,1.44            |
| 2 ANC visits                                       | 1.06                       | 0.698          | 0.79,1.44            |
| 3 ANC visits                                       | 1.16                       | 0.315          | 0.87,1.54            |
| 4+ ANC visits                                      | 0.95                       | 0.638          | 0.75,1.19            |
| One TT** dose during this pregnancy                | 0.94                       | 0.692          | 0.70,1.27            |

|                                                   |      |                     |           |
|---------------------------------------------------|------|---------------------|-----------|
| Two TT** doses during this pregnancy              | 1.22 | 0.035*              | 1.01,1.46 |
| 1 TT dose over lifetime                           | 0.90 | 0.639               | 0.58,1.39 |
| 2+ TT doses over lifetime                         | 0.98 | 0.832               | 0.79,1.21 |
| Iron folate supplementation (0-2 months baseline) |      |                     |           |
| 2-5 months                                        | 1.00 | 0.974               | 0.79,1.28 |
| 6+ months                                         | 0.67 | 0.025*              | 0.47,0.95 |
| Do not know                                       | 1.00 | 0.983               | 0.76,1.33 |
| Maternal tobacco use                              | 1.15 | 0.711               | 0.56,2.34 |
| Cooking smoke during pregnancy                    | 0.98 | 0.948               | 0.61,1.60 |
| Mother uses paan / betal leaf                     | 1.00 | 0.985               | 0.81,1.24 |
| <i>Sample size variation</i>                      |      | n = 44,738 - 58,907 |           |

\* Mid-Upper Arm Circumference (MUAC)

\*\*Tetanus Toxoid (TT) Vaccine injection

Web Table 3 Birth procedure-related risk factors – Unadjusted values

|                                                       | Relative Risk | Bacterial Infection |                            |
|-------------------------------------------------------|---------------|---------------------|----------------------------|
|                                                       |               | p-value             | 95% Cred. Int              |
| Non-skilled birth attendant                           | 0.86          | 0.088               | 0.72,1.02                  |
| Sterile instrument* used to cut umbilical cord        | 1             | .                   | ..                         |
| Non-sterile instrument used to cut umbilical cord     | 1.21          | 0.039*              | 1.01,1.44                  |
| Unknown implement used to cut umbilical cord          | 0.99          | 0.973               | 0.61,1.62                  |
| No clean delivery kit used                            | 0.78          | 0.014*              | 0.634,0.95                 |
| Hand washing                                          | 1             | .                   | ..                         |
| Birth attendant did not wash hands at delivery        | 0.80          | 0.406               | 0.47,1.36                  |
| Other caregiver(s) did not wash hands                 | 1.16          | 0.401               | 0.82,1.66                  |
| Vaginal examinations (none performed baseline)        |               |                     |                            |
| 1 Exam                                                | 0.88          | 0.421               | 0.64,1.21                  |
| 2 Exams                                               | 1.09          | 0.424               | 0.88,1.36                  |
| 3 or more exams                                       | 1.02          | 0.866               | 0.78,1.34                  |
| Unknown                                               | 1.17          | 0.581               | 0.67,2.04                  |
| Non-clear amniotic fluid                              | 1.13          | 0.382               | 0.86,1.47                  |
| Duration of labor (baseline 0-6 hours)                |               |                     |                            |
| 6-11 hours                                            | 1.11          | 0.358               | 0.89,1.38                  |
| 12-23 hours                                           | 1.41          | 0.005**             | 1.11,1.80                  |
| 24-47 hours                                           | 1.11          | 0.602               | 0.75,1.64                  |
| 48-71 hours                                           | 1.22          | 0.728               | 0.39,3.78                  |
| 72+ hours                                             | 0.18          | 0.995               | 0.00,1.38 <sup>e+216</sup> |
| Duration of water break to birth (0-6 hours baseline) |               |                     |                            |
| 6-11 hours                                            | 1.39          | 0.042*              | 1.013,1.91                 |
| 12-23 hours                                           | 1.77          | 0.000***            | 1.29,2.42                  |
| 24-47 hours                                           | 2.04          | 0.000***            | 1.40,2.97                  |
| 48-71 hours                                           | 1.70          | 0.214               | 0.74,3.87                  |
| 72+ hours                                             | 0.56          | 0.994               | 0.00,2.16 <sup>e+67</sup>  |
| Duration of Stay in Facility (No stay nominal value)  |               |                     |                            |
| <24 hours in health facility                          | 9.40          | 0.000***            | 7.66,11.54                 |
| 24 hours - <48 hours in health facility               | 9.73          | 0.000***            | 6.75,14.04                 |
| 48 hours - < 72 hours in health facility              | 6.50          | 0.000***            | 4.12,10.24                 |
| >72 hours in health facility                          | 0.25          | 0.000***            | 0.19,0.34                  |
| PROM (water broke before labor pain)                  | 1.37          | 0.003**             | 1.11,1.68                  |

|                                                  |      |                   |           |
|--------------------------------------------------|------|-------------------|-----------|
| Birth position (lying on covered floor baseline) |      |                   |           |
| Lying on bare (uncovered) floor                  | 1.38 | 0.309             | 0.74,2.58 |
| Lying on bed                                     | 1.26 | 0.015*            | 1.05,1.52 |
| Squatting                                        | 1.28 | 0.439             | 0.68,2.39 |
| Delivery attendant                               |      |                   |           |
| Health worker                                    | 0.96 | 0.654             | 0.79,1.16 |
| Unknown                                          | 1.33 | 0.643             | 0.39,4.52 |
| Vernix left on after birth                       |      |                   |           |
| Vernix cleaned after birth                       | 1    | .                 | ..        |
| Unknown                                          | 1.08 | 0.429             | 0.90,1.29 |
| Unknown                                          | 1.38 | 0.280             | 0.77,2.47 |
| Wrapped < 10 minutes                             |      |                   |           |
| Wrapped 10-30 minutes                            | 1    | .                 | ..        |
| Wrapped 31-60 minutes                            | 0.98 | 0.867             | 0.77,1.24 |
| Wrapped > 60 minutes                             | 1.71 | 0.164             | 0.80,3.65 |
| Not wrapped/unknown                              | 1.76 | 0.054             | 0.99,3.12 |
| Not wrapped/unknown                              | 0.63 | 0.161             | 0.33,1.21 |
| Unclean umbilical binding                        | 1.37 | 0.001***          | 1.14,1.64 |
| Sterile substance** applied                      |      |                   |           |
| No substance applied                             | 1    | .                 | ..        |
| Non-sterile substance applied                    | 0.99 | 0.957             | 0.71,1.38 |
| Unknown                                          | 0.81 | 0.291             | 0.55,1.20 |
| Unknown                                          | 1.46 | 0.180             | 0.84,2.53 |
| Colostrum given                                  |      |                   |           |
| Colostrum discarded                              | 1    | .                 | ..        |
| Unknown                                          | 0.83 | 0.101             | 0.67,1.04 |
| Unknown                                          | 2.10 | 0.000***          | 1.64,2.69 |
| Exclusive breastfeeding                          |      |                   |           |
| Non-exclusive breastfeeding                      | 1    | .                 | ..        |
| Non-exclusive breastfeeding                      | 0.96 | 0.661             | 0.78,1.17 |
| Non-facility delivery                            | 0.83 | 0.033*            | 0.69,0.98 |
| No reported stay in hospital                     |      |                   |           |
| Stay in hospital 1 day or less                   | 1    | .                 | ..        |
| Stay in hospital over 1 day                      | 5.38 | 0.000***          | 3.80,7.60 |
| Stay in hospital over 1 day                      | 1.81 | 0.220             | 0.70,4.64 |
| <i>Sample size variation</i>                     |      | n = 55,168-58,907 |           |

Exponentiated coefficients: \* p < 0.05, \*\* p < 0.01, \*\*\* p < 0.001

\*Sterile instrument: sterile delivery kit, unused blade.

\*\*Sterile Substance applied: antiseptic or antibiotic substance.

**Web Table 4 - Environmental risk factors – Unadjusted values**

|                                                          | Relative Risk | Bacterial Infection |               |
|----------------------------------------------------------|---------------|---------------------|---------------|
|                                                          |               | p-value             | 95% Cred. Int |
| Respiratory symptoms reported in household               | 0.99          | 0.916               | 0.69,1.40     |
| One or more under-five children                          | 0.78          | 0.006**             | 0.65,0.93     |
| Water from a unclean source                              | 0.82          | 0.142               | 0.63,1.07     |
| Toilet facilities (flush baseline)                       |               |                     |               |
| Latrine/VIP latrine                                      | 1.11          | 0.328               | 0.90,1.37     |
| Unsanitary or no formal toilet                           | 1.51          | 0.000***            | 1.22,1.86     |
| No handwashing station present in home                   | 1.24          | 0.091               | 0.97,1.59     |
| Goats, cows, buffaloes live in the house or compound     | 0.98          | 0.832               | 0.83,1.17     |
| Hen, chicken, ducks, geese live in the house or compound | 1.14          | 0.164               | 0.95,1.37     |
| Other birds live in the house or compound                | 1.27          | 0.359               | 0.76,2.10     |
| Dogs live in the house or compound                       | 1.08          | 0.535               | 0.85,1.36     |
| Cats live in the house or compound                       | 1.06          | 0.599               | 0.85,1.33     |
| Other animals live in the house or compound              | 1.25          | 0.718               | 0.37,4.27     |
| Any animals in the compound                              | 0.98          | 0.864               | 0.81,1.19     |
| <i>Sample size variation</i>                             |               | n = 58,370-59,687   |               |

Exponentiated coefficients: \* p < 0.05, \*\* p < 0.01, \*\*\* p < 0.001

**Web Table 5 - Demographic risk factors – Unadjusted values**

|                                                               | Relative Risk | Bacterial Infection |               |
|---------------------------------------------------------------|---------------|---------------------|---------------|
|                                                               |               | p-value             | 95% Cred. Int |
| <b>Socio-economic status*</b> (Highest SES quintile baseline) |               |                     |               |
| Fourth SES quintile                                           | 1.32          | 0.070               | 0.98,1.79     |
| Third SES quintile                                            | 1.62          | 0.001**             | 1.21,2.17     |
| Second SES quintile                                           | 1.66          | 0.001***            | 1.25,2.20     |
| First (lowest) SES quintile                                   | 1.81          | 0.000***            | 1.36,2.39     |
| <b>Maternal Education</b> (No education baseline)             |               |                     |               |
| Primary incomplete                                            | 1.05          | 0.808               | 0.73,1.49     |
| Primary complete                                              | 1.05          | 0.741               | 0.80,1.37     |
| Secondary incomplete                                          | 0.82          | 0.116               | 0.64,1.05     |
| Above secondary                                               | 0.96          | 0.746               | 0.75,1.23     |
| <b>Paternal Education</b> (No education baseline)             |               |                     |               |
| Primary incomplete                                            | 1.14          | 0.453               | 0.81,1.61     |
| Primary complete                                              | 1.00          | 0.975               | 0.76,1.33     |
| Secondary incomplete                                          | 1.06          | 0.670               | 0.82,1.36     |
| Above secondary                                               | 0.93          | 0.531               | 0.75,1.16     |
| <b>Maternal Work</b> (No work baseline)                       |               |                     |               |
| Works in home                                                 | 1.11          | 0.406               | 0.87,1.43     |
| Works outside home                                            | 1.08          | 0.691               | 0.73,1.61     |
| <b>Maternal Decision Making</b>                               |               |                     |               |
| Mother not involved in major purchasing decisions             | 0.91          | 0.349               | 0.75,1.11     |
| Mother not involved in household purchase decisions           | 0.94          | 0.527               | 0.78,1.14     |
| Mother not involved in visitation decisions                   | 0.88          | 0.158               | 0.73,1.05     |
| Mother not involved in health decisions                       | 0.85          | 0.074               | 0.71,1.02     |
| <i>Sample size variation</i>                                  |               | n = 58,368-58,907   |               |

Exponentiated coefficients: \* p < 0.05, \*\* p < 0.01, \*\*\* p < 0.001

\* SES based on site-specific wealth quintile
